# Supplementary material
Source: publisher figshare collection journal article supplement (https://future-science-group.figshare.com/ndownloader/files/32904485)
Supplement: Supplementary file 1 [file 32904485]

**Supplemental Table 1: Average Participant Responses to Questions Assessing Attitudes Toward PGx Testing on a Scale of 1 (Strongly Disagree) to 5 (Strongly Agree)**

|  | Average Score |
| --- | --- |
| I feel comfortable about the pharmacogenetic tests that might be offered to me, if they could predict if a medication would work for my condition. | 4.2 ± 0.7 |
| I feel comfortable about the pharmacogenetic tests that might be offered to me, if they could predict the correct dose of the medication that I needed. | 4.3 ± 0.7 |
| I feel comfortable about the pharmacogenetic tests that might be offered to me, if they could predict a mild side effect. | 4.1 ± 0.8 |
| I feel comfortable about the pharmacogenetic tests that might be offered to me, if they could predict a serious side effect. | 4.3 ± 0.9 |
| I feel comfortable about the pharmacogenetic tests that might be offered to me, if they could explain a family history of medication side effect or nonresponse. | 4.1 ± 0.8 |

PGx: pharmacogenetic
